# Supplementary material
Source: Springer Nature journal article supplement (https://www.springermedizin.de/resource/supplementary/12879_2012_2262_MOESM5_ESM.pdf/9443738)

(A)

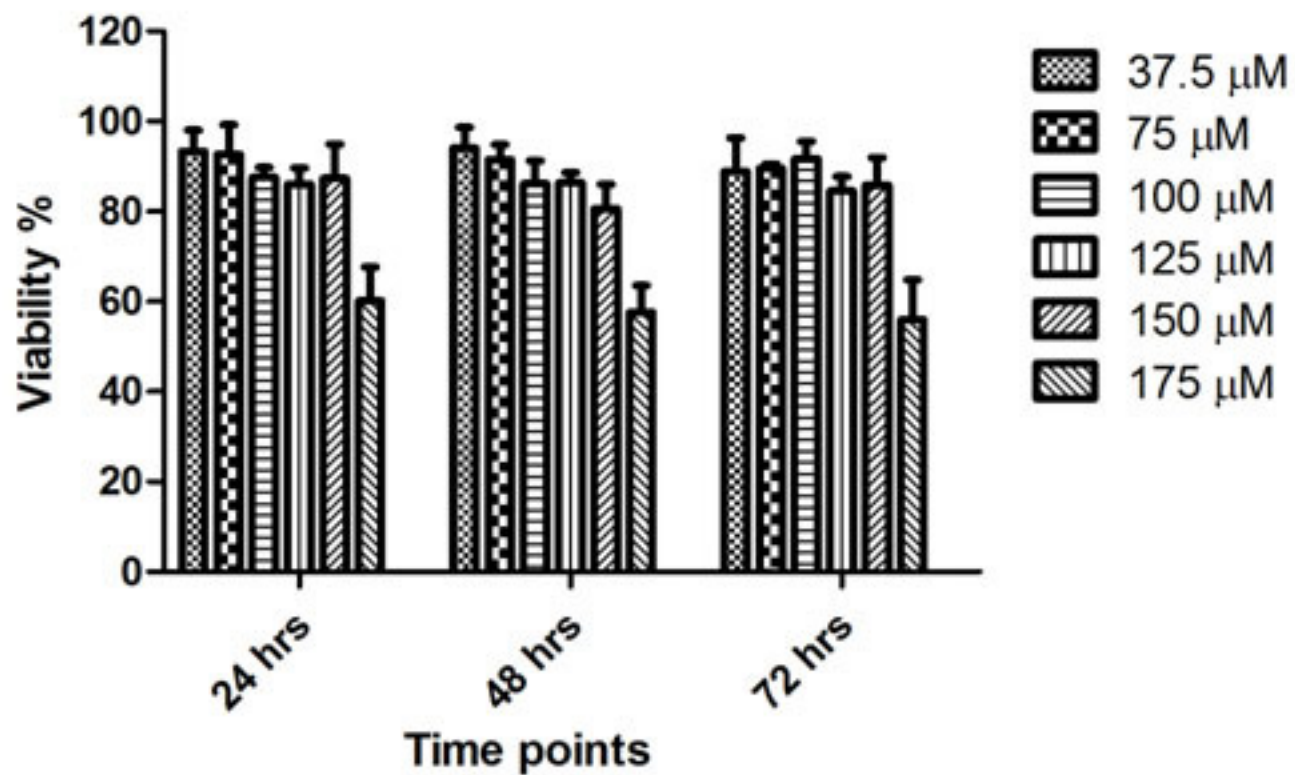

(B)

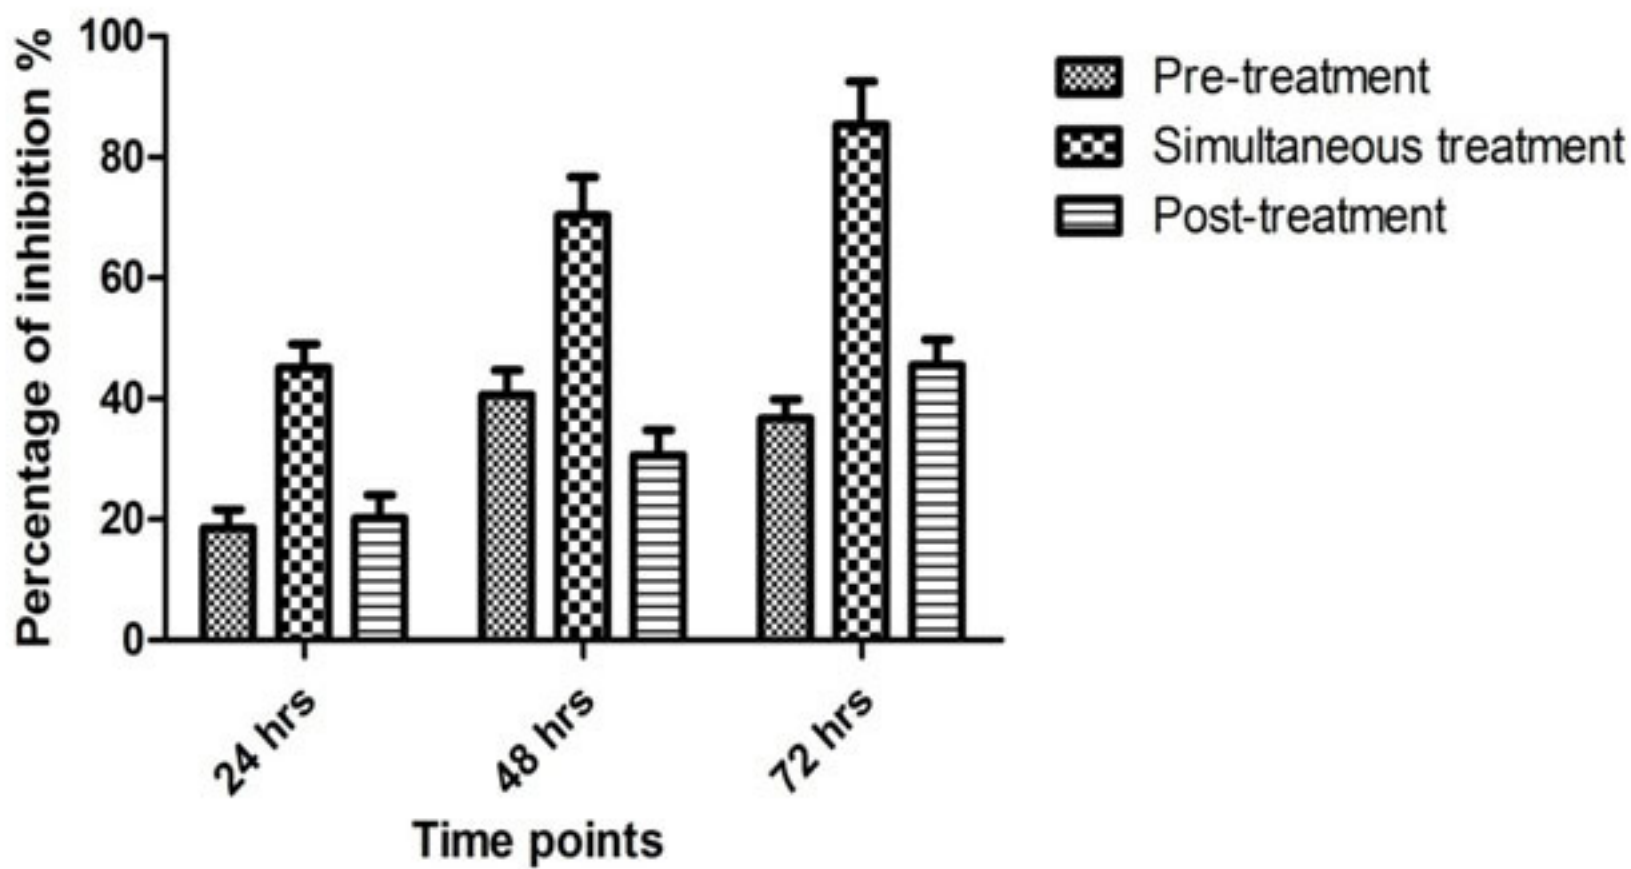

Supplement: MOESM5 [file 9443738]
